# Supplementary material for: Genome Features of a New Double-Stranded RNA Helper Virus (LBCbarr) from Wine Torulaspora delbrueckii Killer Strains
Source: MDPI journal article supplement (doi:10.3390/ijms222413492), 2021-12-16
Supplement: s1 [file s1]

# Supplementary Materials

## 1.1 Supplementary Figures

```
LBbarr2 GAAATTAGCTGTAGCCAATCGATTGCCATGTTCTCAACTCTTAACAATTTACTACCCGAT 60
LBC-ori GAAATTTTC----GGTGAACCGGAATTATGTCGTCTCTGTTAAATTCATTACTACCAGAA 56
LBclus4 GAAATTTTC----AGTGAACCGGAATTATGTCGTCTCTGTTAAATTCATTATTACCAGAA 56
      *** ** * * * * * * * * * *
5' conserved
LBbarr2 ACTTTAAACCCCTCGTAAGAATTTCAAACCTACTCACCATAGAATTAAATATGGTATGAAT 120
LBC-ori TATTTTAAACCTAAACCTAATTTGAATATCAACTCTTCTAGGGTCCAATATGGCTTTAAT 116
LBclus4 TATTTTAAACCCAAACAAATTTGAATATCAACTCCTCTAGGATCCAATATGGTTTAAAT 116
      *** ** * * * * * * * * * *

LBbarr2 GCCAACATCAATTTTCGATGTTTCTGATGACTTTGGGAAATATGAAGGTAATAGACCGGGT 180
LBC-ori GCTCGCATTTGATATGCAGTATGAAGACGATAGTGGGACTAGAAAAGGCTCAAGACCCAAT 176
LBclus4 GCTCGCATTTGATATGCAGTATGAAGACGATAGTGGGACTAGAAAAGGCTCAAGGCCCAAT 176
      ** *** ** * * * * * * * * * *

LBbarr2 GCTTTTATTGGAAATGAAGTATCTCTTTATGGTAATTACAATTTCTTATATCACGGATGAC 240
LBC-ori GCATTTATGTCTAACACAGTTGCTTTTATAGGAACTATGAAGGTATTATTGTTGATGAC 236
LBclus4 GCCTTTATGTCTAATACGTTGCTTTTATTGGAACTATGAAGGTGTCATCGTTGATGAC 236
      ** * * * * * * * * * *

LBbarr2 GTGCCAATCTATGATGGTATGCGGTCTGATGTGATCACTCCTGAAGGAGAGTTTACGCCAT 300
LBC-ori ATTCGATATTTGGATGGTCTTAGGGCCGACATTTTGATACTCATGGTGACTTAGACATG 296
LBclus4 ATCCGATATTTGGATGGCTTAGAGCTGACATTTTGATACTCATGGTGATTTAGACATG 296
      * * * * * * * * * *

LBbarr2 GAATTAGCTGAGCAAGTGTTAAGTAAAGCGACATCGGACCGAGCATCCGCTCAGAAGATC 360
LBC-ori GGCCTCGTTGAGGATGCATTGTCTAAGAGTACCATGATTAGAAGGAATGTACCAACTTAT 356
LBclus4 GGCCCTCGTAGAGGATGCATTGTCCAAAAGTACTATGATTAGAAGGAATGTACCAACTTAT 356
      * * * * * * * * * *

LBbarr2 ACGCAATACTTGGCATACAATGGAGGTATGCGCAATTGTGTATCTATATTGTATAACTTA 420
LBC-ori ACTGCTTACGCGAGTGAATTACTGTATAAGAGAAACCTTACATCTCTATTTTACAATATG 416
LBclus4 ACTGCTTACGCGAGTGAATTATTGTATAAGAGAACTTAACATCTCTGTTTACAATATG 416
      ** *** * * * * * * * * * *

LBbarr2 CTCCGTATGTATGTATGAATGAGTTTGGCGAGGTGGTCTATGACCCAAACGAGATATTC 480
LBC-ori CTCCGTTTATACTACATTAATAAATGGGGCAGTATTAAGTATGAAAAAGATGCCATCTTT 476
LBclus4 CTCCGTTTATACTACATTAATAAATGGGGTAGTATTAAGTATGAAAAAGATGCCATTTT 476
      ** * * * * * * * * * *

LBbarr2 TACGACAATGGACATGTGTGTATTAATAATCATCAGATGTTTCCAAAACATCTAGAGAAG 540
LBC-ori TATGATAATGGCCAGCCTGTCTTTTAAACAGGCAATTGTTTCCAAAGTCTCGTGATGCT 536
LBclus4 TATGATAATGGCCAGCCTGTCTTTTAAACAGGCAATTGTTTCCGAAGTCTCGTGATGCT 536
      ** * * * * * * * * * *

LBbarr2 AAGTCATTAGCTAAGGCTGTT---GAGTACACTCCTGCTATGATCGAAGATGCTAGCACC 597
LBC-ori TCTTTGGAATCAAGCCTCTCTTTGCGCTGAGGCTGAAATTGCAATGCTTGATCCTGGCCTG 596
LBclus4 TCTTTGGAATCAAGCCTCTCTTTACCTGAGGCAGAAATTGCAATGCTTGATCCTGGATTG 596
      * * * * * * * * * *

LBbarr2 TTATGGCGCGAAGGTGACATACCTGAATGTCCTTCATTGATTTGGACAGGATTTATGCGT 657
LBC-ori GAAATTTCCAGAAGAGGATGTGCTGCG-----AATTTTATGGCACGGCAGAGTGTCA 647
LBclus4 GAAATTTCCAGAAGAGGATGTGCTGCG-----AATTTTATGGCATGGCAGAGTGTCA 647
      ** * * * * * * * * * *

LBbarr2 GATAAGCAAGCTACTATCGTTTACGGGCAGCAGGTGGATTTCATTACAGAGCACCTTTC 717
LBC-ori TCCAGAGCAACGTGTATCTTAGGGCAAGCTTGCTCAGAGTTGCGGCTCTGGCCCCCTTT 707
LBclus4 TCCAGAGCTACGTGTATCTTAGGGCAAGCCTGTCTGAATTTGCGCCTCTGGCCCCCTTT 707
      * * * * * * * * * *

LBbarr2 GGAGTAGCTCATGAGTCAAAAAATCTTACTGAAAGATTAGGTATCATGGCAACTGGAGGA 777
LBC-ori TCGATTGCGCATTATTCACCACAATTGACGAGAAAACTATTGTCAATGCGCCCGCTGGG 767
LBclus4 TCAATTGCGCATTATTCACCACAATTGACAAGAAAACTATACGTCAATGCGCCCGCTGGG 767
      * * * * * * * * * *
```

LBCbarr2 CTCTCTAATGTAGAAGATTATAACTATGGTCCTTCTGATATATTGTTTCGTCCTTAACAAG 837  
 LBC-ori ATTGAGCCTA--GCTCCGGGCGGTATACTCACGAGGATGTAAAAGATGCGATTACGATC 824  
 LBclus4 ATTGAGCCTA--GCTCCGGGCGGTATACTCACGAGGATGTAAAAATGCGATTACGATC 824  
 \* \* \*\*\* \*\* \*\*\* \* \*\*\* \*  
  
 LBCbarr2 CTGGTGACAGATAACGGGCTTTTACTGACTTCACCTTACGCTTATCTAATGTTGTTACAA 897  
 LBC-ori CTTGTGTCTGCAAACAGGCTTATACTGACTTTGAAGCAGCATACCTTGATGCTTGCTCAA 884  
 LBclus4 CTTGTGTCTGCTAACCAGGCTTATACTGACTTTGAGGCAGCATACCTTGATGCTTGCTCAA 884  
 \*\* \*\*\* \* \* \*\*\* \* \*\*\* \*\*\*\*\* \*\* \* \* \* \* \*  
  
 LBCbarr2 GTATTAGTGTCCTCTATACCAAGGTCTGCTGAAGCTGCAGCATGGTTCGTCGGTGTCCAG 957  
 LBC-ori ACGTTGGTCTCACCTGTACCACGCACTGCCGAAGCAAGTGCATGGTTCATCAATGCTGGC 944  
 LBclus4 ACATTGGTCTCACCTGTACCACGCAAGCCGAAGCTAGTGCATGGTTCATTAATGCTGGT 944  
 \*\* \* \* \* \* \* \* \* \* \* \* \* \* \* \* \* \* \* \*  
  
 LBCbarr2 ACAGTGTCTTTACCTAGGTTGGTGACTGACACAGGAAACATACCACAGTTATATCAGGGG 1017  
 LBC-ori ATGGTCAATATGCCAATTTGTGTCATGTGCAAATGGTTATTATCCAGCACTGACCAATGTC 1004  
 LBclus4 ATTGTTAACATGCCTATCTTGTGTCATGTGCTAATGGCTACTACCCAGCCTTAACAAATGTT 1004  
 \* \* \* \* \* \* \* \* \* \* \* \* \* \* \* \* \* \*  
  
 LBCbarr2 AAAGTCTATGCTAGGTTTAAATGACTGGAAGAGACTATGGCTAACTTCAGAGCATATCCT 1077  
 LBC-ori AATCCTTACCACCGCTAGACACATGGAAAGATACGTTAAATCATTGGGTGGCTTATCCC 1064  
 LBclus4 AATCCTTACCACCGGTTAGACACATGGAAAGACACTTTAAATCATTGGGTGTCTTACCCC 1064  
 \*\* \*\* \* \* \* \* \* \* \* \* \* \* \* \* \* \* \* \* \* \*  
  
 LBCbarr2 AAGTCATGTTTATTGCATAGTATGTAGTGAATGAAGCTGTTTACGTTGAATGAACAAT 1137  
 LBC-ori GACATGCTGTTTACCATTTCAGTGGCAATGATTGAGAGCTGCTATGTTGAACTCGGGAAT 1124  
 LBclus4 GACATGTTATTTTACCATTTCGGTGGCAATGGTTGAGAGCTGTTATGTTGAACTGGGGAAT 1124  
 \* \* \* \* \* \* \* \* \* \* \* \* \* \* \* \* \* \*  
  
 LBCbarr2 CTTAACAGAGTGAGTCCTTTTGTATGCAATTAATCGAGAAAATTTTGTGAGGTAGCTGTA 1197  
 LBC-ori GTGGCTCGTGTGTGACACAGTGTATGCAATAAACAAATACACTTTCACTGAGCTATCAGTG 1184  
 LBclus4 GTCGCACGTGTGTGACACAGTGTATTAATTAACAAGTATACCTTCACTGAGCTATCTGTG 1184  
 \* \* \* \* \* \* \* \* \* \* \* \* \* \* \* \* \* \*  
  
 LBCbarr2 CAAGGGCAGCCTGTCACAATGGGCGGGATATTGAATGATCTGACTTTAGTGTGATGCGG 1257  
 LBC-ori CAAGGACGGCTGTATGAATCGAGGAATATTGTAGATCTGACACTTGTGGCAATGCGT 1244  
 LBclus4 CAAGGCCGGCTGTATGAACCGAGGGATTATTGTTGACTTGACACTTGTAGCAATGCGT 1244  
 \*\*\*\*\* \* \* \* \* \* \* \* \* \* \* \* \* \* \* \* \* \* \*  
  
 LBCbarr2 TATTCTAAGGAATTTGCACTGGCATATCCTGTGTCCACAGGACTTACAAGGACTAACATT 1317  
 LBC-ori ACTGGTAGGAGATCTCACTACCTTACCCGGTCAGCTGTGGCCTGACCCGTACAGACGCG 1304  
 LBclus4 ACTGGTAGAGATCTCACTACCTTACCCAGTTAGTTGTGGTTTGACCCGTACAGACGCA 1304  
 \* \* \* \* \* \* \* \* \* \* \* \* \* \* \* \* \* \*  
  
 LBCbarr2 ATGGCACAAGAAATAGCTCTTGAGGTACCAATAACAGTAAAAGACCTAGATGCACCTAAA 1377  
 LBC-ori TTATTGCAAGGTACTGAGATTACGTTCCAGTTGTTGTCAAAGATATCGACATGCCCCAG 1364  
 LBclus4 TTATTGCAAGGTACGGAGATTCTGTTCCAGTTGTCGTCAAAGACATGGACATGCCTCAG 1364  
 \* \* \* \* \* \* \* \* \* \* \* \* \* \* \* \* \* \*  
  
 LBCbarr2 TATTACAACATTGCAGAACCTATTATAACCGCAAATCAACATGCAACACTCATTGTTACT 1437  
 LBC-ori TATTACAACGCGATTGATAAGGATGTTATTGAGGGGCGAGAACTGTGATTAAAGTGAAA 1424  
 LBclus4 TATTATAATGCAATCGATAAGGATGTTATTGAAGGGCAAGAACTGTAATAAAGTGAAG 1424  
 \*\*\*\*\* \*\* \* \* \* \* \* \* \* \* \* \* \* \* \* \* \* \*  
  
 LBCbarr2 AATATGACGGCACCTTTGTATCCAGTAATGTCTTACGGGATTAATACTGATGACTATTAT 1497  
 LBC-ori CAGCTGCCACCAGCATGTATCCAATTTATACTTACGGGATCAACACTACTGAATTCTAT 1484  
 LBclus4 CAAGTGCCACCAGCAATGTATCCGATTTATACTTATGGTATCAACACTACAGAGTTTAC 1484  
 \* \* \* \* \* \* \* \* \* \* \* \* \* \* \* \* \* \*  
  
 LBCbarr2 TGTAACGATACGAACATCAGTATCAAATTTA--AGGCACCTGTGACTGCAAGTGGGATA 1554  
 LBC-ori TCTGACCATTTTGAAGACCAGGTACAAGTTGAAATGGCACCAATCGATAATGGAAAAGCA 1544  
 LBclus4 TCCGACCATTTTGAAGACCAGGTACAAGTAGAAATGGCTCCTATCGATAATGGGAAGGCA 1544  
 \* \* \* \* \* \* \* \* \* \* \* \* \* \* \* \* \* \*  
  
 LBCbarr2 TCTTTTACAGAAGCAGAAAATTTCTCAAAGTTTATGAACGTTATGCGTATGTGTGGGTAT 1614  
 LBC-ori GTTTTAAACGATGCAAGAAAGTTTCGAAATTTATGTCCATAATGCGCATGATGGGGAAT 1604  
 LBclus4 GTCTTTAATGATGCTCGAAAATTTCTCTAAATTCATGTCTATAATGCGCATGATGGGGAAT 1604  
 \*\*\*\*\* \*\* \* \* \* \* \* \* \* \* \* \* \* \* \* \* \* \*  
  
 LBCbarr2 AACGTTGAGGCCAGAGAGATGTTTTCAGGCAAGACTGTCATTAACCTGGGCAGATAATGCT 1674  
 LBC-ori GATGTTACTGCTACTGATTTAGTTACAGGTAGAAAAGTGTGCAATTGGGCCGACAACCTCA 1664  
 LBclus4 GATGTTACGCAACTGATTTAGTAACAGGTAGAAAGGTGTGCAATTGGGCCGACAACCTCA 1664

\* \* \* \* \* \* \* \* \* \* \* \* \* \* \* \* \* \* \* \*

LBCbarr2 AGTGGAAAGATTTTTATATACAGATGCTCAAGTTGGTGAGGATATACATTATCATGTACCT 1734  
 LBC-ori TCAGGGCGTTTCTTGTACACGGATGTGAAGTATGAAGGACAAACTGCCTTTTGGTTGAT 1724  
 LBclus4 TCAGGGCGTTTCTTATACCTCAGATGTCAAGTATGAAGGCCAAACTGCTTTTGGTTGAT 1724  
           \* \* \* \* \* \* \* \* \* \* \* \* \* \* \* \* \* \* \* \*

LBCbarr2 TACGCCAACATTTCATAGGCGGAGTAATTCATGGTTAAACGTGATAACCTTTAGAGGTGAA 1794  
 LBC-ori ATGGATACTGTCAAGGCGAGAGACCACTGTTGGGTGTCAATTGTTGATCCTAATGGTACA 1784  
 LBclus4 ATGGACACTATTAAGGCTAGAGACCATTGCTGGGTGTCAATTGTGGATCCTAATGGCACG 1784  
           \* \* \* \* \* \* \* \* \* \* \* \* \* \* \* \* \* \* \* \*

LBCbarr2 ACAGCCTTCAATGCGAACATCACAGCTGTGAATTTTAAATGTTCAACGGCCCATCTGAA 1854  
 LBC-ori ATGAACTTGTTCATATAAGATGACCAATTTTAGAGCAGCAATGTTTCTAGAAACAAGCCC 1844  
 LBclus4 ATGAGCTTGTTCATATAAGATGACAAATTTAGGGCAGCAATGTTTCAAGAAACAACCT 1844  
           \* \* \* \* \* \* \* \* \* \* \* \* \* \* \* \* \* \* \* \*

LBCbarr2 GTACTAATGACAGGGCCTCGAGTTATGCCAGTACAGATGAATGACTTCGTAGACAAGGCA 1914  
 LBC-ori TTGTATATGACAGGGGGGTGAGTACAGGACCATAGCTACTGGCAATTCGAGATGCTGCT 1904  
 LBclus4 CTATACATGACAGGTGGATCAGTACGACTATAGCTACTGTTAACTACCGGTGATGCCGCT 1904  
           \* \* \* \* \* \* \* \* \* \* \* \* \* \* \* \* \* \* \* \*

LBCbarr2 ATTGAAATTGCTTCTCGTACTGACACGATTAATACTTACCTCTACGAAAACTATGCTG 1974  
 LBC-ori GAAAGATTACGTGCAATGGATGAAACGCTCAGATTAATACTTTAAGATTACTGAGAAG 1964  
 LBclus4 GAGAGGTTGCGTGCATGGACGAAACGTTGAGGTTAAAGCCTTTAAGATTACTGAGAAG 1964  
           \* \* \* \* \* \* \* \* \* \* \* \* \* \* \* \* \* \* \* \*

LBCbarr2 CCGGATTTTCGATTCTCAGGTATCAGTTCCTCGGGTGTGTCGGGGATGGGGAATACTGTC 2034  
 LBC-ori TTGGATTTTCGTGTAGCAGCTTACGCGATACCAAGTTTGTGCGGCAGCAATATGCCATCC 2024  
 LBclus4 TTGGATTTTCGTGTAGCAGCTTATGCGATACCAAGTCTGTGCGGCAGCAATATGCCATCC 2024  
           \*\*\*\*\* \* \* \* \* \* \* \* \* \* \* \* \* \* \* \* \* \* \* \* \*  
 -1 Frame-shift site    *Stem-loop for frame-shift ( $\Delta G = -21.9$  kJ/mol in LBCbarr2,  $\Delta G = -35.1$  kJ/mol in LBC-ori)*

LBCbarr2 TTGCCACGGGAGAGCACACAACAGTTTGGCCAGGAAGAACAGAGCTAGTGAATCCAGAG 2094  
 LBC-ori TTACACCATCAGGAACAACATACAGATATCAGAAGTGGACGCGGAACCAATCAATCCTATA 2084  
 LBclus4 TCACACCATCAGGAACAACATACAGATATCAGAAGCGGACGCGGAGCCGATCAATCCTGTG 2084  
           \* \* \* \* \* \* \* \* \* \* \* \* \* \* \* \* \* \* \* \*

LBCbarr2 GCGAGAGATATGTCAATCCAGGATGTAGAG **TAG**-----TACCGACATATCTA 2141  
 LBC-ori GGAGAGGACGAACCTCCACCGGATATAGAA **TAG**GTGTCGAAGACGATGAGGACTTAGATA 2144  
 LBclus4 GGAGAGGACGAACCTCCACCGGATGTAGAG **TAG**GTGTTGAAGATGATGAAGACTTAGATA 2144  
           \* \* \* \* \* \* \* \* \* \* \* \* \* \* \* \* \* \* \* \*

**Stop of Gap LBC and LBCbarr**

LBCbarr2 A-----CAATAGAC-----GGG---GAGATGACGACAACGC 2169  
 LBC-ori TTGGTACGGTCAAATACATTGTGCCATTGTATTGAACGGTGATAATGTGGCACAACCT 2204  
 LBclus4 TTGGTACGGTCAAATACATTGTGCCATTGTATTGAACGGTGATAATGTGGCACAACCT 2204  
           \*\*\*\*\* \* \* \* \* \* \* \* \* \* \* \* \* \* \* \* \*

LBCbarr2 CAGAGGAAGCTGACAAAGTGCT---TCTGGCCATGTATTATCAAACCAGAAAGTGATTA 2226  
 LBC-ori GTTTAGAAGCAACACAGTGCTTATCAAAGCTTGTAGTATTGCGAACCGGATTGTAGATG 2264  
 LBclus4 GTTTAGAAGCAACACATGTACTTATTAAGCTTGTAGTGTGCAAACCGGATTGTAGATG 2264  
           \*\*\*\*\* \* \* \* \* \* \* \* \* \* \* \* \* \* \* \* \*

LBCbarr2 AGACTAAGGCAGGATCTTTCACTCAGACTGGATTATCTAAGCAGATGATAGTTTATAATG 2286  
 LBC-ori ACGGAGAGGGTCACTGTTTACACAGCAAGGGCTGGCGCAGCAGTGGATCTTCCATAGGG 2324  
 LBclus4 ATGGAGAGGGTCACTGCTTACACAGCAAGGGCTAGCACAGCAGTGGATCTTCCATAGGG 2324  
           \* \* \* \* \* \* \* \* \* \* \* \* \* \* \* \* \* \* \* \*

LBCbarr2 GGATGACAGTTAATACCGAGCTCATCAGAATTGGGGATGTCAATTGTTATTATGTACGGT 2346  
 LBC-ori GGGAGATGATATTTGTGAAGGCGGTACGCATTGGTCAACTCAATGCATATTATGTAGACT 2384  
 LBclus4 GGGAGATGATATTTGTGAAGGCGGTACGCATTGGCCAGCTCAATGCATACTATGTAGACT 2384  
           \*\* \* \* \* \* \* \* \* \* \* \* \* \* \* \* \* \* \* \* \* \*

LBCbarr2 TGAAGTTTTGTGATGCAGCATCAAAGAAATTACACGTCAAGCAGGAGCAACGATGTGTG 2406  
 LBC-ori ATAAGAACGTCACAAATATAGTCTTAAACCGCTGCTCAAGTAGGAGCGACGATATCAA 2444  
 LBclus4 ATAAGAACGTCAACAATTACAGTCTTAAACCTGCTGCTCAAGTGGGAGCGACGATATCAA 2444  
           \*\*\* \* \* \* \* \* \* \* \* \* \* \* \* \* \* \* \*

LBCbarr2 GTAACCTCAGACACTTGTTTGCGAACTCAACTGGTACAGTATACGATTGGCTGGACCGGG 2466  
 LBC-ori ATAACCTACGCCACGGATTGTTGACAAATCAACAAGACGCATACACGCGCTTGGTTGCCA 2504  
 LBclus4 ACAACTTACGTATGGATTGCTTGAACACAGCAAGACGCATACACGCGCTTGGTTGCCA 2504  
           \*\*\*\*\* \* \* \* \* \* \* \* \* \* \* \* \* \* \* \* \*

LBCbarr2 ACAAACCGTATTAAGAATGTACGACAGGCTTGCTAGTTACAAGTATGACTACAATATAG 2526

LBC-ori ACTACTCTG--ATACGCGGAAGTGGATACGTGACAATTTTACATATAATTATAAT--A 2558  
 LBclus4 ATTACTATG--ATACACGGAAGTGGATACGTGACAATTTTACATATAATTATAAT--A 2558  
 \* \* \* \* \*

LBCbarr2 CTGATAAAATAACAGAAAAATAAGTCAGTTTCATCATGTACACGTGAGGCTGAAGGACT 2586  
 LBC-ori TGGAGAAAGAAAAGTATAGGATAACCCAAATACCACCATACACATGTGAGGTTGAAAGATT 2618  
 LBclus4 TGGAGAAAGAAAATATAAGATAACTCAATATCACCACACACACGTTAGATTGAAAGATT 2618  
 \*\* \*\*\* \*\* \* \* \*\*\*\* \*\* \* \* \* \* \* \*\*\* \* \* \* \* \* \*\* \*

LBCbarr2 TATATGCTAATAAGGATATTGTGACAGTAAACGGTCATGAAGCATATCTCGTGAACCTTAC 2646  
 LBC-ori TGTTTCCATCCAGGAAAATAGTTAAACTAGAGGGATATGAAGCCTTGTTGGCAATGATGC 2678  
 LBclus4 TGTTTCCATCTAGGAAAGTAGTCAAACCTAACAGGATACGAGGCCCTTACTGGCAATGATGT 2678  
 \* \* \* \* \* \* \* \* \* \* \* \* \* \* \* \* \* \* \* \* \* \* \* \*

LBCbarr2 TTGATAAGTACACAGACAAAGCTATTACACATGCTACTTTCATAACCTATCTAAGAGCAC 2706  
 LBC-ori TAGACAGGTTTAAACAACATAGAGTCAACACATGTAACCTTCTTCACATATTAAAGAGCAC 2738  
 LBclus4 TAGATAGGTTCAACAATATAGAGTCAACACATGTACCTTTTTCACATACTTGAGGGCAT 2738  
 \* \* \* \* \* \* \* \* \* \* \* \* \* \* \* \* \* \* \* \* \* \* \*

LBCbarr2 TGCCTGTTAGGGAAGCAAGGCTCTTCATAAAATTAGTCATTAAGTATGGTAGCATAGACC 2766  
 LBC-ori TACCTGACCGTGAAAAAGAAGTCTTTATTAGCTTAGTCTTAACTATAATGGCCTTGGCA 2798  
 LBclus4 TGCCTGATCAAGAGAGGGAATCTTCATTAGCTTAATTTTGAACATAACCGGCTTGGTA 2798  
 \* \* \* \* \* \*\* \* \* \* \* \* \* \* \* \* \* \* \* \* \* \* \*

LBCbarr2 AAGAATGGTTAAAAGAAGAAGGGACTGTAGCAAAGCAAATACAGGGCAGCACTGACTTTG 2826  
 LBC-ori GAGAGTGGTTGAAGTCTGAAGGTGTTAGGGCTAAACAGCACAAGGTAAGTGTGAAATACG 2858  
 LBclus4 GAGAGTGGTTAAAGTCAGAAGGTGTTAGGGCAAAGCAAGCGCAAGGTAAGTGTGAAAGTATG 2858  
 \*\*\* \* \* \* \* \* \* \* \* \* \* \* \* \* \* \* \* \* \* \* \* \*

LBCbarr2 ATCTAAGCAAAATTTTGGAGCTTAATGTACTGCATAATCGGGTTGAAACTACAGTTGATT 2886  
 LBC-ori ATATGAGTAAACTATTTGAACTGAATGTACTAGAGAACGGAGTTGACGAAGAAGTTGACT 2918  
 LBclus4 ATATGAGTAAATTTTGGAGCTCAATGTGTTGAAAAATAGGGTTGACGAAGAGGTTGACT 2918  
 \*\* \* \* \* \* \* \* \* \* \* \* \* \* \* \* \* \* \* \* \* \* \*

LBCbarr2 GGAATGAAGAAAGAGAACATAGGACGCATCCTGATACAGTGAATATATCTTATCCAGATG 2946  
 LBC-ori GGGAGAAAGAGAAACGCAACAGGTCAGATATCAAGACTGTTAACATAAGTTATGCAAAAG 2978  
 LBclus4 GGGAAAAAGAAAAAGCAAGACGACGAACATCAAGACTGTAGACATAAGTTATGCAAAAG 2978  
 \*\* \* \* \* \* \* \* \* \* \* \* \* \* \* \* \* \* \* \* \* \* \*

LBCbarr2 TCTATACTAAGTGCAGAGAATTGTTTGAATAGCAAAGCAGGAAGGAAAGTCACCTATTA 3006  
 LBC-ori TTCTCGAACATTGTAGAGAGCTATTATCATGCGCAGGGCCGAAGGGAAACGGCCAATGA 3038  
 LBclus4 TTCTTGAGCAGCTGTAGAGAATTTATCATGGCAAGGGCTGAAGGAAAGCGGCCAATGA 3038  
 \* \* \* \* \* \* \* \* \* \* \* \* \* \* \* \* \* \* \* \* \*

LBCbarr2 AGATGGACTGGAATAAGTACTGGATGCAGCGAGCCTCAATAATGCCATCTGGTGCAGTCC 3066  
 LBC-ori GGATGAAATGGCAAGAGTACTGGAGGCAGAGAGCAGTTATCATGCCAGGTGGATCGGTCC 3098  
 LBclus4 GGATGAAATGGCAGGAGTATGGAGGCAGAGAGCAGTTGTGATGCCAGGCGGTTTCAGTCC 3098  
 \*\*\*\* \* \* \* \* \* \* \* \* \* \* \* \* \* \* \* \* \* \* \* \*

LBCbarr2 ACTCACAACATAGTGAGCTTGACAAGTATGTGAGGAAATTACCTCGTGAAGTCAAAAACA 3126  
 LBC-ori ACAGTCAACATCCAGTCGAACAGGACGTGATTAGAGTATTACCCAGAGAAATCAGAAGTA 3158  
 LBclus4 ACAGTCAGATCCAGCCGAACAAGATGTGATTAGATATTACCCAGGGAAATTAAGAGTA 3158  
 \*\* \* \* \* \* \* \* \* \* \* \* \* \* \* \* \* \* \* \* \* \*

LBCbarr2 AGAAGGGGTTGGCTGCCTCGCTACCTAATATAGACCAGAGGTACTTTCTGAGTAAATAC 3186  
 LBC-ori AGAAGGGGTTGGCAAGTGTGCATGCCATACAAAGAACAGAAGTATTTACGTCAGAGGCG 3218  
 LBclus4 AGAAGGGGTTGGCAAGTGTATGTCATATAAAGAACAAAAATATTTACATCAAGCGCAG 3218  
 \*\*\*\*\* \* \* \* \* \* \* \* \* \* \* \* \* \* \* \* \*

LBCbarr2 CTTCTATTGAAGCGTATGTCTAGTACAAAGTATGAATGGGGAAAAGTCAGGGCTTTATATG 3246  
 LBC-ori CGGAAATACACGCTTACACTTCAACGAAATACGAGTGGGGAAAAGTGAGGGCACTATATG 3278  
 LBclus4 CAGAAATACATGCTTACACTTCCACAAAATATGAGTGGGGAAAAGTGAGAGCGTTGTACG 3278  
 \* \* \* \* \* \* \* \* \* \* \* \* \* \* \* \* \* \* \* \*

*Highly conserved RdRp domain*

LBCbarr2 GATGTGATTTCAGCAGTCATGTTAATGCAGACTTTGGATTATTAAATTGTGAAGATACCT 3306  
 LBC-ori GGTGTGATTTTTCATCACATACAATGGCTGATTTTGGATTGTTACAATGCGAGGATACAT 3338  
 LBclus4 GGTGTGACTTTTTCATCACACACGATGGCTGATTTTGGGCTGTACAGTGTGAGGATACAT 3338  
 \* \* \* \* \* \* \* \* \* \* \* \* \* \* \* \* \* \* \* \*

LBCbarr2 TCCCTCACTTTATACCTACTGGGCCACAAGCTACTGAGGGGTACGTAAAAACACTTTTAA 3366  
 LBC-ori TCCCGGGCTTTGTACCAACAGGGTCTTACGCCAATGAGGATTATGTGAGGACAGAAATTG 3398  
 LBclus4 TCCCGGATTTGTACCAACGGGGTCATATGCTAACGAGGACTATGTGAGGACTAGGATAG 3398  
 \*\*\*\* \* \* \* \* \* \* \* \* \* \* \* \* \* \* \* \*



```

LBclus4  TTGGTGATTACACAGCATTTCTTAAAACTAACTTCTCCGAAATAGCTGATGCTATCACAA 4298
**      **      *      *      *      *      *      *      *      *      *      *

LBCbarr2 AAAAGACAGTGAGAAGGACACTTATGAAAGCCTTCAACATAAATAAAAAACGATATGTA 4320
LBC-ori  GAGAGACACGTGTAGAGTCAGTGACCAAGGCTTATAATGTTAAGAAGAAAAACGTCGTAC 4358
LBclus4  AGAAACATGTTGTAGAGTCATTGACCAAGGCCTACAATGTCAAGAAGAAAACGGTCAGAA 4358
*      *      *      *      *      *      *      *      *      *      *      *

LBCbarr2 TCAAACCAGCCAGTAGCAAGGCGATATATAATCAGATAGCACTAAGAGGTGCATGGAATG 4380
LBC-ori  GCGCGTTTATGGGACCTAAGCGCAGCATATCATGAAAGAGCGGTGAGACATGCTTGGAAAG 4418
LBclus4  GCGCGTTTATGGGACCTAAGCGCAGCATATCATGAGAGAGCAGTTAGACATGCTTGGAAAG 4418
*      *      *      *      *      *      *      *      *      *      *      *
Stem-loop for packaging ( $\Delta G = -52.3$  kJ/mol)
LBCbarr2 ATGACTCTAATTTTCAAGATATTTAACAGAGTTAGACAGGGTGTGAGTAACGTGATAGGCG 4440
LBC-ori  GGATGAGTGGACTACACATAGTCAACAGGATTGCTATGGGAGTGAGCAACTTAGTAATGG 4478
LBclus4  GGATGAGCGGACTACATATAGTTAACAGGGTTCGTATGGGCGTAAGCAACTTAGTAATGG 4478
*      *      *      *      *      *      *      *      *      *      *      *

LBCbarr2 TATTAGGTAACTGTCCAATGCGCATGCAAAAGTATTAAGCGAAACAAATGA 4500
LBC-ori  TTGTTAGCAAAATCAATCCTGCAAAAGCTAATGTGCTAGCCAAATCAGGAGATCCTACAA 4538
LBclus4  TTGTTAGCAAAATCAATCCTGCGAAAGCTAATGTGTTAGCCAAATCAGGGGATCCCACCA 4538
*      *      *      *      *      *      *      *      *      *      *      *
Stop of LBCbarr2 Gag-Pol
LBCbarr2 AATGGTTGTCTATATATATAACATAGATGTAATACCAAGAAAGTTGTGACCTATATGACA 4560
LBC-ori  AATGGCTTGCAGTCCTTACATGATATACAGGCAACCACATAAGACCTGAGAACAAAGAGT 4598
LBclus4  AATGGCTTGTGCTCCTTACATGATATACAGGCAACAACATAAGACCTGAGAACAAAGAGT 4598
***** *      *      *      *      *      *      *      *      *      *      *
Stop of LBC-ori and LBclus4 Gag-Pol
LBCbarr2 ACGGC----- 4565
LBC-ori  ACATACGATACTACGCA 4615
LBclus4  ACATACGATACTACGCC 4615
**
Stem-loop for replication ( $\Delta G = -13.8$  kJ/mol)

```

*Stem-loops for replication in LBV-ori ( $\Delta G = -7.5$  kJ/mol and  $\Delta G = -2.9$  kJ/mol, respectively)*

**Figure S1.** Multiple sequence alignment between ScV-LBC1-original, ScV-LBclus4, and TdV-LBCbarr2 (+) strand nucleotide sequences (cDNA). 5'GAA(A/T)TT conserved motif (5' conserved), translation initiation (start of Gag and Gag-Pol, or internal possible start ATG in Pol ORF of LBC1-original, LBclus4 and LBCbarr2), termination codons (stop of Gag and stop of Gag-Pol), ribosome frameshifting site (-1 frameshift site), frameshifting associated sequence (stem loop for frameshift), packaging signal (stem loop for packaging), and replication signal (stem loop for replication) are indicated, shaded and/or underlined in the nucleotide sequence. The highly conserved RdRp domain located in the central third of Pol is also underlined.  $\Omega$ , ribosomal frameshift. Asterisks (\*) indicates identical nucleotide positions.



```

      : *  .:.*:** : *  . :*:**.******: .:.*: : *:* * . :*:** :
LBCbarr2 AITHATFITYLRLALPVREARLFIKLVIKYGSIDQEWLKEEGTVAKQIQGSTDFDLSKIFE 940
LBC-ori  ESTHVTFFTYLRLALPDREKEVFISLVLYNGLGREWLKSEGVRKQAQGTVKYDMSKLF 952
LBClus4  ESTHVTFFTYLRLALPDQEREIFISLVLYNGLGREWLKSEGVRKQAQGTVKYDMSKLF 952
      **.*:***** :*  .:.*:**.******: .:.*:**.* ** *:.*:**.*
LBCbarr2 LNVLHNRVETTVDWNEEREHRTHPDTVNISYPDVYTKCRELFELAKQEGKSPIKMDWNKY 1000
LBC-ori  LNVLENGVDEEVDWEKEKRNRSDIKTVNISYAKVLEHCRELFIMARAEGKRPMMRWQ 1012
LBClus4  LNVLENRVDEEVDWEKEKRNRTNIKTVDISYAKVLEHCRELFIMARAEGKRPMMRWQ 1012
      ****.* : * : **.*:..:..:.. :*.*** .* :***** :* : ** *:.*:**.*
LBCbarr2 WMQRASIMPSGAVHSQHSSELDKYVRKLPREVKNKKGLAASLPNIDQRYFLSKIPSI EAYV 1060
LBC-ori  WRQRAVIMPGGSVHSQHPVEQDVIRVLPREIRSKKGVASVMPYKEQKYFTSRRPEI HAYT 1072
LBClus4  WRQRAVIMPGGSVHSQHPAEQDVIKILPREIKSKKGLASVMSYKEQKYFTSRRPEI HAYT 1072
      * ** :*.*** :***** :. : : *****:..***:* : : *:* ** : *.***.
      ▶—3—◀
LBCbarr2 STKYEWGKVRALYGCDFSSHVNADFGLLNCEDTFPHFIPTGPOATEGYVKTLLKTAKYNV 1120
LBC-ori  STKYEWGKVRALYGCDFSSHTMADFGLLOCEDTFPGFVPTGSYANEDYVRTRIAGTHSLI 1132
LBClus4  STKYEWGKVRALYGCDFSSHTMADFGLLOCEDTFPGFVPTGSYANEDYVRTRIAGTHSLI 1132
      *****:*****.* *****.*.***:* : : :
      ▶—A—◀
LBCbarr2 PFCYVDDFNSQHSKSSMOAVIDAWINTYFDDLTEDQIASALWTRESVGMFVNDVKNSV 1180
LBC-ori  PFCYVDDFNSOHSKEAMOQVIDAWISVYHDKLTDDQIEAAKWTRNSVDRMVAHOPNTGE 1192
LBClus4  PFCYVDDFNSQHSKSSMOAVIDAWISVYHDKLTDDQVEAAKWTRNSVDRMVAHQTNTGE 1192
      *****:*****.* *****.*.***:* : * **.*.***: : :
      ▶—B—◀ ▶C◀
LBCbarr2 RYEAMGTLFSGWRLTTFINTALNYAYLAKAGINKLTNISIHNDDVYAGTRNLKDIARLL 1240
LBC-ori  TYDVKGTLFSGWRLTTFINTALNYCYLANAGINSLVPTSLHNGDDVFAGIRTIADGISLI 1252
LBClus4  TYDVKGTLFSGWRLTTFINTALNYCYLANAGINSLVPTSLHNGDDVFAGIRTIADGISLI 1252
      *:. *****:*****.* *****.*. *****.*.***:* : * **.*.
      ▶D◀
LBCbarr2 KNSKQMGIRANTTKMSIGTIAEFLRVDMRAEKPTSAQYLTRGISTFVHGRIESEAPVGYR 1300
LBC-ori  KNAATGVRANTTKMNIGTIAEFLRVDMRAKNSTGSQYLTRGIATFTHSRVESDAPLTLR 1312
LBClus4  RNAATGVRANTTKMNIGTIAEFLRVDMRAKDTGSQYLTRGVATFTHSRVESDAPLTLR 1312
      :* : *:* **.* *****:.. :. *****:*.***:* **.*.***:* :
LBCbarr2 AMVSAYKTRYDEVVERGGNAQRLRHLYRKQLFFARRKFDVSEEMQEKLKTHVQAGGLSV 1360
LBC-ori  NLVSAYKTRYDEILARGASIDNMKPLYRKQLFFARKLFNVEKDIVDNLITMDISCGGLQE 1372
LBClus4  NLVSAYKTRYDEIIARGANVDDMKPLYRKQLFFARKLFNVEKGIIDNLITMDISCGGLQD 1372
      :*****: **.* : : : *****: *:. : :*:.. :..***.
LBCbarr2 NGKIGNYTLLEDDSLAYAD--IDVNEISSLLQPGVKDYVTSLSKSLYPEIREFITEKTVRRT 1418
LBC-ori  KGRVSEMLVQEVDIENIDSYRKTRMIAKLIDKGVGDYTAFLKTNFSEIADAITRETRVES 1432
LBClus4  KGVSEVVLVQEVDIENIDSYKTRMIAKLIDKGVGDYTAFLKTNFSEIADAITKKHVVES 1432
      :*:. :*.***: : * .. **.*: **.*: **.*: **.*: **.*: **.*:
LBCbarr2 LMKAFNINKNTICIKPASSKAIYNQIALRGAWNDDSNFRIFNRVRQGVSNVIGVLGKLSN 1478
LBC-ori  VTKAYNVKKKTVVRFAFRDLAAYHERAVRHAWKMSGLHIVNRIRMGVSNLVMVSKINP 1492
LBClus4  LTKAYNVKKKTVRSAFRDLAAYHERAVRHAWKMSGLHIVNRVRMGVSNLVMVSKINP 1492
      : **.*:*.***: . .* *:. *:* **.* :. :*.***:* *****: *:.***.
LBCbarr2 AHAKVLSETNDPIKWLSIYIT 1499
LBC-ori  AKANVLAKSGDPTKWLAVLT- 1512
LBClus4  AKANVLAKSGDPTKWLAVLT- 1512
      *:.***:..** *****:

```

**Figure S2.** Comparison of the amino acid sequences of Gag-Pol encoded by ScV-LBC1-original, ScV-LBClus4, and TdV-LBCbarr2. The separation between Gag and Pol domains is indicated (Gag ◀▶ Pol). The H156 residue required for 5' cap-snatching is black shaded. The four crucial residues for cap recognition (Tyr-152, Asn-154, Tyr-452 and Trp-545) are grey shaded. The highly conserved RdRp domain located in the central third of Pol is underlined, the five consensus motifs (3, A, B, C, and D) conserved in RNA-dependent RNA polymerases from Totiviruses are indicated above the sequence, and the conserved amino acids for each motif are grey shaded. Asterisks (\*) indicate identical amino acids; colons (:) and single dots (.) indicate conserved and semi-conserved amino acids, respectively.



|                     |     |     |     |     |     |     |     |     |
|---------------------|-----|-----|-----|-----|-----|-----|-----|-----|
| TdV-LBCbarr1-EX1180 | 100 | 94  | 52  | 52  | 52  | 52  | 52  | 52  |
| TdV-LBCbarr2-EX1257 | 94  | 100 | 51  | 52  | 52  | 52  | 52  | 52  |
| ScV-LBclus4-EX229   | 52  | 51  | 100 | 89  | 88  | 87  | 89  | 89  |
| ScV-LBC2-S3920      | 52  | 52  | 89  | 100 | 93  | 94  | 94  | 94  |
| ScV-LBC-original    | 52  | 52  | 88  | 93  | 100 | 95  | 95  | 95  |
| ScV-LBC2-EX1125     | 52  | 52  | 89  | 94  | 95  | 100 | 100 | 100 |
| ScV-LBclusA-EX1160  | 52  | 52  | 89  | 94  | 95  | 100 | 100 | 100 |
| ScV-LBC1-EX231      | 52  | 52  | 89  | 94  | 95  | 100 | 100 | 100 |

Colors: *T. delbrueckii* cluster *S. cerevisiae* cluster

**Figure S3.** Percentage identity matrix for canonical V-LBC nucleotide sequences. Each value was rounded to the nearest whole number.

|                     |     |     |     |     |     |     |     |     |
|---------------------|-----|-----|-----|-----|-----|-----|-----|-----|
| TdV-LBCbarr1-EX1180 | 100 | 99  | 64  | 66  | 66  | 66  | 66  | 66  |
| TdV-LBCbarr2-EX1257 | 99  | 100 | 64  | 66  | 66  | 66  | 66  | 66  |
| ScV-LBclus4-EX229   | 64  | 64  | 100 | 97  | 97  | 97  | 97  | 97  |
| ScV-LBC2-S3920      | 66  | 65  | 97  | 100 | 98  | 98  | 98  | 98  |
| ScV-LBC-original    | 65  | 65  | 97  | 98  | 100 | 99  | 99  | 99  |
| ScV-LBclusA-EX1160  | 66  | 66  | 97  | 98  | 99  | 100 | 100 | 100 |
| ScV-LBC1-EX231      | 66  | 66  | 97  | 98  | 99  | 100 | 100 | 100 |
| ScV-LBC2-EX1125     | 66  | 66  | 97  | 98  | 99  | 100 | 100 | 100 |

Colors: *T. delbrueckii* cluster *S. cerevisiae* cluster

**Figure S4.** Percentage identity matrix for highly-conserved RdRp-domain amino-acid sequences. Each value was rounded to the nearest whole number.

|                     |     |     |     |     |     |     |     |     |
|---------------------|-----|-----|-----|-----|-----|-----|-----|-----|
| TdV-LBCbarr1-EX1180 | 100 | 99  | 37  | 37  | 37  | 37  | 37  | 37  |
| TdV-LBCbarr2-EX1257 | 99  | 100 | 37  | 37  | 37  | 37  | 37  | 37  |
| ScV-LBclus4-EX229   | 37  | 37  | 100 | 98  | 97  | 97  | 97  | 97  |
| ScV-LBC1-original   | 37  | 37  | 98  | 100 | 99  | 99  | 99  | 98  |
| ScV-LBclusA-EX1160  | 37  | 37  | 97  | 99  | 100 | 100 | 100 | 98  |
| ScV-LBC1-EX231      | 37  | 37  | 97  | 99  | 100 | 100 | 100 | 98  |
| ScV-LBC2-EX1125     | 37  | 37  | 97  | 99  | 100 | 100 | 100 | 98  |
| ScV-LBC2-S3920      | 37  | 37  | 97  | 98  | 98  | 98  | 98  | 100 |

Colors: *T. delbrueckii* cluster *S. cerevisiae* cluster

**Figure S5.** Percentage identity matrix for Gag amino-acid sequences of LBC viruses. Each value was rounded to the nearest whole number.
